# Supplementary material for: First-trimester presentation of ultrasound findings in trisomy 13 and validation of multiparameter ultrasound-based risk calculation models to detect trisomy 13 in the late first trimester
Source: publisher site journal article supplement (doi:10.1515/jpm-2020-0383), 2020-10-19
Supplement: Supplementary file 1 [file j_jpm-2020-0383_suppl_001.docx]

Figure 1. Study population diagram. T13  =  trisomy 13, IUFD  =  intrauterine fetal demise, TOP  =  termination of pregnancy.

Figure 2. From the left: detection rates (DRs) and false-positive rates (FPRs) of the “NT+ T13”, “NT+ T18” and “NT+ T21” for cutoffs of 1/300, 1/100, 1/50 depending on maternal age (MA) ranges.
