# Supplementary material for: First-trimester presentation of ultrasound findings in trisomy 13 and validation of multiparameter ultrasound-based risk calculation models to detect trisomy 13 in the late first trimester
Source: publisher site journal article supplement (doi:10.1515/jpm-2020-0383), 2020-10-19
Supplement: Supplementary file 3 [file j_jpm-2020-0383_suppl_002.docx]

T13= trisomy 13

T18= trisomy 18

T21= trisomy 21

PS= Patau syndorme

DR= detection rate

FPR= false positive rate

OR= odds ratio

CST= combined screening test

NIPT= Noninvasive prenatal screening

EUROCAT= European surveillance of congenital anomalies

NT= nuchal translucency

FHR= fetal heart rate

NB= nasal bone

TF= tricuspid flow

TR= tricuspid regurgitation

DV= ductus venosus

MA= maternal age

CRL= crown-rump length

BMI= Body Mass Index

FMF= Fetal Medicine Foundation

revDV= reversed a-wave

IUFD= intrauterine fetal demise

TOP=  termination of pregnancy

SUA= single umbilical artery

US= ultrasound

ECM= extracardiac malformation

CNS= central nervous system

CHD= congenital heart defect

PPV=positive predictive value

NPV=negative predictive value

CI= confidence interval

AUC= area under the curve

ROC= receiver operating characteristic curve

AVSD= atrioventricular septal defect

HPE= holoprosencephaly

MC= megacystis

CDH= congenital diaphragmatic hernia

OMPH= omphalocele
